# Supplementary material
Source: PubMed Central journal article supplement (PMC5477212)

Supplemental material is neither peer-reviewed nor thoroughly edited by CJASN. The authors alone are responsible for the accuracy and presentation of the material.

**SUPPLEMENTAL TABLE 1. Associations between quintiles of non-normalized (raw) biomarker concentrations and the risk of heart failure**

|                     | Events<br>(rate per 1000<br>person-years) | Unadjusted       | Model 1:<br>Demographic*<br>adjusted | Model 2: Model 1 +<br>ACR + eGFR | Model 3: Model 2 +<br>CVD risk factors# |
|---------------------|-------------------------------------------|------------------|--------------------------------------|----------------------------------|-----------------------------------------|
| <b>KIM-1 (ng)</b>   |                                           |                  |                                      |                                  |                                         |
| ≤253.4              | 36 (13)                                   | Ref              | Ref                                  | Ref                              | Ref                                     |
| >253.4-521.95       | 54 (20)                                   | 1.57 (1.03-2.39) | 1.49 (1.98-2.28)                     | 1.14 (0.75-1.75)                 | 1.15 (0.74-1.79)                        |
| >521.95-918.42      | 68 (26)                                   | 2.01 (1.3-4.3)   | 1.82 (1.21-2.73)                     | 1.25 (0.83-1.9)                  | 1.24 (0.81-1.91)                        |
| >918.42-1675.25     | 84 (33)                                   | 2.57 (1.74-3.8)  | 2.43 (1.64-3.59)                     | 1.52 (1.01-2.27)                 | 1.51 (1.0-2.29)                         |
| >1675.25            | 91 (38)                                   | 2.9 (1.97-4.26)  | 2.62 (1.77-3.87)                     | 1.3 (0.86-1.96)                  | 1.44 (0.94-2.22)                        |
| Per SD              |                                           | 1.42 (1.27-1.6)  | 1.38 (1.23-1.55)                     | 1.07 (0.95-1.21)                 | 1.12 (0.98-1.28)                        |
| <b>NGAL (mcg)</b>   |                                           |                  |                                      |                                  |                                         |
| ≤1.4                | 46 (16)                                   | Ref              | Ref                                  | Ref                              | Ref                                     |
| >1.4-4.8            | 47 (18)                                   | 1.13 (0.75-1.7)  | 1.06 (0.71-1.6)                      | 0.83 (0.55-1.26)                 | 0.88 (0.57-1.34)                        |
| >4.8-11.8           | 64 (25)                                   | 1.55 (1.06-2.27) | 1.42 (0.97-2.09)                     | 0.87 (0.58-1.29)                 | 0.89 (0.59-1.33)                        |
| >11.8-31            | 63 (24)                                   | 1.51 (1.03-2.21) | 1.33 (0.9-1.97)                      | 0.63 (0.42-0.95)                 | 0.64 (0.42-0.98)                        |
| >31                 | 113 (49)                                  | 3.03 (2.15-4.26) | 2.72 (1.9-3.89)                      | 0.8 (0.53-1.22)                  | 0.98 (0.63-1.52)                        |
| Per SD              |                                           | 1.46 (1.32-1.62) | 1.42 (1.28-1.58)                     | 0.92 (0.81-1.06)                 | 0.99 (0.86-1.14)                        |
| <b>L-FABP (mcg)</b> |                                           |                  |                                      |                                  |                                         |
| Undetectable        | 32 (14)                                   | Ref              | Ref                                  | Ref                              | Ref                                     |
| Below LLD (2.4)     | 48 (18)                                   | 1.27 (0.81-1.99) | 1.3 (0.83-2.05)                      | 1.11 (0.71-1.74)                 | 1.16 (0.73-1.84)                        |
| > 2.4-4.90          | 54 (19)                                   | 1.36 (0.88-2.1)  | 1.35 (0.87-2.09)                     | 1.09 (0.7-1.7)                   | 1.09 (0.69-1.72)                        |
| > 4.90-13.57        | 80 (29)                                   | 2.06 (1.37-3.11) | 1.98 (1.31-3.0)                      | 1.02 (0.66-1.58)                 | 0.93 (0.6-1.47)                         |
| > 13.57-370         | 120 (48)                                  | 3.4 (2.3-5.02)   | 3.27 (2.19-4.89)                     | 1.05 (0.67-1.64)                 | 1.22 (0.76-1.94)                        |
| <b>NAG (U)</b>      |                                           |                  |                                      |                                  |                                         |
| ≤0.841              | 37 (13)                                   | Ref              | Ref                                  | Ref                              | Ref                                     |
| >0.841-1.504        | 59 (22)                                   | 1.7 (1.12-2.56)  | 1.49 (0.99-2.26)                     | 0.98 (0.64-1.49)                 | 1.04 (0.67-1.6)                         |
| >1.504-2.549        | 58 (22)                                   | 1.68 (1.11-2.53) | 1.5 (0.99-2.27)                      | 0.82 (0.53-1.26)                 | 0.98 (0.63-1.54)                        |
| >2.549-4.705        | 80 (32)                                   | 2.43 (1.65-3.59) | 2.11 (1.42-3.12)                     | 0.97 (0.64-1.47)                 | 1.08 (0.7-1.66)                         |
| >4.705              | 99 (40)                                   | 3.06 (2.1-4.47)  | 2.7 (1.85-3.96)                      | 1.2 (0.79-1.81)                  | 1.38 (0.9-2.12)                         |
| Per SD              |                                           | 1.39 (1.26-1.53) | 1.37 (1.24-1.52)                     | 1.1 (0.98-1.24)                  | 1.13 (1.0-1.27)                         |

LLD: Lower Limit of Detection; \*Demographic adjusted: age,sex,race/ ethnicity,clinical center; § ACR: albumin-creatinine ratio; #CVD risk factors: diabetes mellitus,smoking,baseline CVD,systolic and diastolic blood pressure,BMI,LDL,HDL,ACE-I: angiotensin converting enzyme inhibitor; ARB: angiotensin receptor blocker; statin,anti-platelet agents,aldosterone antagonist

Supplemental material is neither peer-reviewed nor thoroughly edited by CJASN. The authors alone are responsible for the accuracy and presentation of the material.

**SUPPLEMENTAL TABLE 2. Associations between quintiles of non-normalized (raw) biomarker concentrations and the risk of atherosclerotic CVD events**

|                     | Events<br>(rate per<br>1000<br>person-<br>years) | Unadjusted       | Model 1:<br>Demographic*<br>adjusted | Model 2: Model 1 +<br>ACR + eGFR | Model 3: Model 2 +<br>CVD risk factors# |
|---------------------|--------------------------------------------------|------------------|--------------------------------------|----------------------------------|-----------------------------------------|
| <b>KIM-1 (ng)</b>   |                                                  |                  |                                      |                                  |                                         |
| ≤253.4              | 27 (10)                                          | Ref              | Ref                                  | Ref                              | Ref                                     |
| >253.4-521.95       | 43 (16)                                          | 1.64 (1.01-2.65) | 1.58 (0.98-2.56)                     | 1.34 (0.82-2.17)                 | 1.25 (0.77-2.04)                        |
| >521.95-918.42      | 71 (27)                                          | 2.79 (1.79-4.35) | 2.51 (1.61-3.92)                     | 2.01 (1.28-3.15)                 | 2.02 (1.28-3.19)                        |
| >918.42-1675.25     | 62 (24)                                          | 2.47 (1.57-3.89) | 2.33 (1.48-3.67)                     | 1.72 (1.08-2.74)                 | 1.54 (0.96-2.46)                        |
| >1675.25            | 79 (32)                                          | 3.36 (2.17-5.19) | 2.94 (1.89-4.57)                     | 1.82 (1.14-2.88)                 | 1.61 (1.0-2.61)                         |
| Per SD              |                                                  | 1.53 (1.35-1.73) | 1.48 (1.3-1.68)                      | 1.25 (1.09-1.44)                 | 1.23 (1.06-1.43)                        |
| <b>NGAL (mcg)</b>   |                                                  |                  |                                      |                                  |                                         |
| ≤1.4                | 43 (15)                                          | Ref              | Ref                                  | Ref                              | Ref                                     |
| >1.4-4.8            | 52 (20)                                          | 1.33 (0.89-1.99) | 1.29 (0.86-1.94)                     | 1.09 (0.73-1.64)                 | 1.24 (0.81-1.9)                         |
| >4.8-11.8           | 49 (19)                                          | 1.25 (0.83-1.88) | 1.26 (0.83-1.9)                      | 0.9 (0.59-1.39)                  | 1.02 (0.66-1.59)                        |
| >11.8-31            | 60 (23)                                          | 1.55 (1.05-2.29) | 1.57 (1.05-2.35)                     | 0.98 (0.64-1.5)                  | 1.24 (0.8-1.91)                         |
| >31                 | 78 (32)                                          | 2.16 (1.49-3.13) | 2.41 (1.64-3.56)                     | 1.1 (0.7-1.72)                   | 1.26 (0.78-2.02)                        |
| Per SD              |                                                  | 1.31 (1.17-1.47) | 1.37 (1.22-1.54)                     | 1.05 (0.91-1.21)                 | 1.1 (0.95-1.28)                         |
| <b>L-FABP (mcg)</b> |                                                  |                  |                                      |                                  |                                         |
| Undetectable        | 30 (13)                                          | Ref              | Ref                                  | Ref                              | Ref                                     |
| Below LLD (2.4)     | 39 (15)                                          | 1.1 (0.69-1.78)  | 1.11 (0.69-1.79)                     | 0.99 (0.61-1.6)                  | 1.01 (0.62-1.64)                        |
| > 2.4-4.90          | 57 (19)                                          | 1.38 (0.88-2.16) | 1.41 (0.89-2.21)                     | 1.22 (0.78-1.93)                 | 1.25 (0.78-1.99)                        |
| > 4.90-13.57        | 69 (25)                                          | 1.74 (1.13-2.68) | 1.77 (1.14-2.73)                     | 1.18 (0.74-1.86)                 | 1.09 (0.68-1.75)                        |
| > 13.57-370         | 87 (34)                                          | 2.83 (1.88-4.27) | 2.96 (1.94-4.5)                      | 1.44 (0.89-2.33)                 | 1.62 (0.98-2.66)                        |
| <b>NAG (U)</b>      |                                                  |                  |                                      |                                  |                                         |
| ≤0.841              | 39 (14)                                          | Ref              | Ref                                  | Ref                              | Ref                                     |
| >0.841-1.504        | 53 (20)                                          | 1.42 (0.94-2.15) | 1.29 (0.85-1.96)                     | 0.98 (0.64-1.49)                 | 1.04 (0.68-1.6)                         |
| >1.504-2.549        | 43 (16)                                          | 1.15 (0.75-1.78) | 1.05 (0.68-1.62)                     | 0.7 (0.44-1.09)                  | 0.84 (0.53-1.33)                        |
| >2.549-4.705        | 70 (28)                                          | 2 (1.35-2.96)    | 1.76 (1.19-2.62)                     | 1.02 (0.67-1.56)                 | 1.07 (0.69-1.65)                        |
| >4.705              | 77 (31)                                          | 2.21 (1.5-3.25)  | 1.99 (1.35-2.95)                     | 1.09 (0.71-1.67)                 | 1.08 (0.69-1.68)                        |
| Per SD              |                                                  | n/a              | n/a                                  | n/a                              | n/a                                     |

LLD: Lower Limit of Detection; \*Demographic adjusted: age,sex,race/ ethnicity,clinical center; § ACR: albumin-creatinine ratio; #CVD risk factors: diabetes mellitus,smoking,baseline CVD,systolic and diastolic blood pressure,BMI,LDL,HDL,ACE-I: angiotensin converting enzyme inhibitor; ARB: angiotensin receptor blocker; statin,anti-platelet agents,aldosterone antagonist

Supplemental material is neither peer-reviewed nor thoroughly edited by CJASN. The authors alone are responsible for the accuracy and presentation of the material.

**SUPPLEMENTALTABLE 3. Associations between quintiles of non-normalized (raw) biomarker concentrations and the risk of all-cause death**

|                     | Events<br>(rate per 1000<br>person-years) | Unadjusted       | Model 1:<br>Demographic*<br>adjusted | Model 2: Model 1 +<br>ACR + eGFR | Model 3: Model 2 +<br>CVD risk factors# |
|---------------------|-------------------------------------------|------------------|--------------------------------------|----------------------------------|-----------------------------------------|
| <b>KIM-1 (ng)</b>   |                                           |                  |                                      |                                  |                                         |
| ≤253.4              | 55 (18)                                   | Ref              | Ref                                  | Ref                              | Ref                                     |
| >253.4-521.95       | 67 (23)                                   | 1.23 (0.86-1.76) | 1.2 (0.84-1.71)                      | 1.03 (0.72-1.47)                 | 1 (0.69-1.45)                           |
| >521.95-918.42      | 89 (30)                                   | 1.67 (1.2-2.34)  | 1.51 (1.07-2.12)                     | 1.23 (0.87-1.73)                 | 1.14 (0.8-1.62)                         |
| >918.42-1675.25     | 103 (36)                                  | 1.99 (1.43-2.76) | 1.88 (1.35-2.62)                     | 1.41 (1.01-1.98)                 | 1.3 (0.92-1.83)                         |
| >1675.25            | 126 (46)                                  | 2.55 (1.86-3.5)  | 2.26 (1.64-3.11)                     | 1.49 (1.06-2.09)                 | 1.35 (0.94-1.92)                        |
| Per SD              |                                           | 1.38 (1.25-1.53) | 1.34 (1.21-1.48)                     | 1.15 (1.03-1.28)                 | 1.11 (0.99-1.25)                        |
| <b>NGAL (mcg)</b>   |                                           |                  |                                      |                                  |                                         |
| ≤1.4                | 55 (18)                                   | Ref              | Ref                                  | Ref                              | Ref                                     |
| >1.4-4.8            | 70 (25)                                   | 1.4 (0.98-1.99)  | 1.3 (0.91-1.85)                      | 1.12 (0.78-1.6)                  | 1.21 (0.84-1.75)                        |
| >4.8-11.8           | 80 (27)                                   | 1.57 (1.11-2.21) | 1.48 (1.05-2.1)                      | 1.1 (0.77-1.57)                  | 1.13 (0.78-1.64)                        |
| >11.8-31            | 96 (33)                                   | 1.91 (1.37-2.67) | 1.81 (1.29-2.54)                     | 1.14 (0.8-1.63)                  | 1.23 (0.86-1.78)                        |
| >31                 | 139 (51)                                  | 2.94 (2.15-4.02) | 2.87 (2.08-3.97)                     | 1.34 (0.92-1.94)                 | 1.44 (0.98-2.13)                        |
| Per SD              |                                           | 1.46 (1.33-1.59) | 1.46 (1.33-1.6)                      | 1.13 (1.01-1.27)                 | 1.14 (1.01-1.28)                        |
| <b>L-FABP (mcg)</b> |                                           |                  |                                      |                                  |                                         |
| Undetectable        | 48 (19)                                   | Ref              | Ref                                  | Ref                              | Ref                                     |
| Below LLD (2.4)     | 63 (22)                                   | 1.15 (0.79-1.68) | 1.15 (0.79-1.68)                     | 1.01 (0.69-1.48)                 | 0.98 (0.67-1.44)                        |
| > 2.4-4.90          | 93 (30)                                   | 1.61 (1.13-2.28) | 1.54 (1.08-2.18)                     | 1.33 (0.93-1.89)                 | 1.33 (0.92-1.91)                        |
| > 4.90-13.57        | 93 (30)                                   | 1.61 (1.14-2.28) | 1.5 (1.05-2.14)                      | 0.96 (0.66-1.39)                 | 0.86 (0.59-1.26)                        |
| > 13.57-370         | 143 (48)                                  | 2.58 (1.86-3.58) | 2.4 (1.72-3.37)                      | 1.08 (0.74-1.57)                 | 1.04 (0.7-1.54)                         |
| <b>NAG (U)</b>      |                                           |                  |                                      |                                  |                                         |
| ≤0.841              | 54 (18)                                   | Ref              | Ref                                  | Ref                              | Ref                                     |
| >0.841-1.504        | 79 (27)                                   | 1.5 (1.06-2.12)  | 1.32 (0.93-1.87)                     | 1.02 (0.71-1.45)                 | 1.08 (0.75-1.54)                        |
| >1.504-2.549        | 91 (31)                                   | 1.75 (1.25-2.46) | 1.6 (1.14-2.25)                      | 1.08 (0.76-1.54)                 | 1.11 (0.77-1.59)                        |
| >2.549-4.705        | 97 (34)                                   | 1.93 (1.38-2.69) | 1.65 (1.18-2.32)                     | 1.01 (0.71-1.44)                 | 1.07 (0.74-1.54)                        |
| >4.705              | 119 (42)                                  | 2.36 (1.71-3.25) | 2.12 (1.53-2.93)                     | 1.31 (0.92-1.87)                 | 1.2 (0.83-1.73)                         |
| Per SD              |                                           | 1.27 (1.16-1.38) | 1.25 (1.15-1.37)                     | 1.1 (0.99-1.22)                  | 1.05 (0.95-1.17)                        |

LLD: Lower Limit of Detection; \*Demographic adjusted: age,sex,race/ ethnicity,clinical center; § ACR: albumin-creatinine ratio; #CVD risk factors: diabetes mellitus,smoking,baseline CVD,systolic and diastolic blood pressure,BMI,LDL,HDL,ACE-I: angiotensin converting enzyme inhibitor; ARB: angiotensin receptor blocker; statin,anti-platelet agents,aldosterone antagonist

Supplemental material is neither peer-reviewed nor thoroughly edited by CJASN. The authors alone are responsible for the accuracy and presentation of the material.

**SUPPLEMENTAL TABLE 4. Associations between quintiles of inverse of urine creatinine and outcomes**

|                                   | Unadjusted       | Model 1:<br>Demographic*<br>adjusted | Model 2: Model 1 +<br>ACR + eGFR | Model 3: Model 2 +<br>CVD risk factors# |
|-----------------------------------|------------------|--------------------------------------|----------------------------------|-----------------------------------------|
| <b>Heart failure</b>              |                  |                                      |                                  |                                         |
| ≤1.09                             | Ref              | Ref                                  | Ref                              | Ref                                     |
| >1.09-1.69                        | 1.30 (0.90-1.88) | 1.32 (0.91-1.91)                     | 1.07 (0.74-1.55)                 | 0.94 (0.64-1.39)                        |
| >1.69-2.41                        | 1.54 (1.08-2.20) | 1.53 (1.06-2.21)                     | 1.08 (0.75-1.56)                 | 0.94 (0.64-1.38)                        |
| >2.41-3.98                        | 1.81 (1.28-2.56) | 1.89 (1.32-2.71)                     | 1.29 (0.89-1.85)                 | 1.17 (0.8-1.71)                         |
| >3.98                             | 1.28 (0.88-1.86) | 1.39 (0.93-2.05)                     | 0.91 (0.61-1.36)                 | 0.80 (0.53-1.23)                        |
| Per SD                            | 1.10 (0.99-1.22) | 1.12 (1.00-1.25)                     | 1.00 (0.89-1.13)                 | 0.97 (0.85-1.1)                         |
| <b>Atherosclerotic CVD events</b> |                  |                                      |                                  |                                         |
| ≤1.09                             | Ref              | Ref                                  | Ref                              | Ref                                     |
| >1.09-1.69                        | 0.98 (0.67-1.43) | 1.01 (0.69-1.48)                     | 0.88 (0.6-1.29)                  | 0.87 (0.58-1.31)                        |
| >1.69-2.41                        | 1.19 (0.83-1.72) | 1.24 (0.86-1.80)                     | 1.00 (0.69-1.45)                 | 1.03 (0.69-1.52)                        |
| >2.41-3.98                        | 1.26 (0.88-1.80) | 1.43 (0.99-2.07)                     | 1.08 (0.74-1.58)                 | 1.10 (0.74-1.64)                        |
| >3.98                             | 0.93 (0.63-1.37) | 1.15 (0.76-1.72)                     | 0.88 (0.58-1.34)                 | 0.79 (0.51-1.23)                        |
| Per SD                            | 0.97 (0.86-1.09) | 1.03 (0.91-1.17)                     | 0.95 (0.83-1.08)                 | 0.90 (0.78-1.04)                        |
| <b>Death</b>                      |                  |                                      |                                  |                                         |
| ≤1.09                             | Ref              | Ref                                  | Ref                              | Ref                                     |
| >1.09-1.69                        | 1.39 (1.02-1.89) | 1.41 (1.03-1.93)                     | 1.20 (0.88-1.64)                 | 1.22 (0.88-1.68)                        |
| >1.69-2.41                        | 1.32 (0.97-1.81) | 1.29 (0.94-1.78)                     | 0.98 (0.71-1.36)                 | 0.96 (0.69-1.35)                        |
| >2.41-3.98                        | 1.47 (1.08-1.99) | 1.58 (1.15-2.16)                     | 1.13 (0.82-1.56)                 | 1.19 (0.85-1.66)                        |
| >3.98                             | 1.38 (1.01-1.89) | 1.56 (1.12-2.17)                     | 1.15 (0.82-1.61)                 | 1.14 (0.80-1.63)                        |
| Per SD                            | 1.09 (0.99-1.19) | 1.13 (1.02-1.24)                     | 1.04 (0.94-1.15)                 | 1.04 (0.93-1.15)                        |

LLD: Lower Limit of Detection; \*Demographic adjusted: age,sex,race/ ethnicity,clinical center; § ACR: albumin-creatinine ratio; #CVD risk factors: diabetes mellitus,smoking,baseline CVD,systolic and diastolic blood pressure,BMI,LDL,HDL,ACE-I: angiotensin converting enzyme inhibitor; ARB: angiotensin receptor blocker; statin,anti-platelet agents,aldosterone antagonists

Supplemental material is neither peer-reviewed nor thoroughly edited by CJASN. The authors alone are responsible for the accuracy and presentation of the material.

### Supplemental Figure 1a. Distribution of eGFR and ACR by quintiles of KIM-1/Cr.

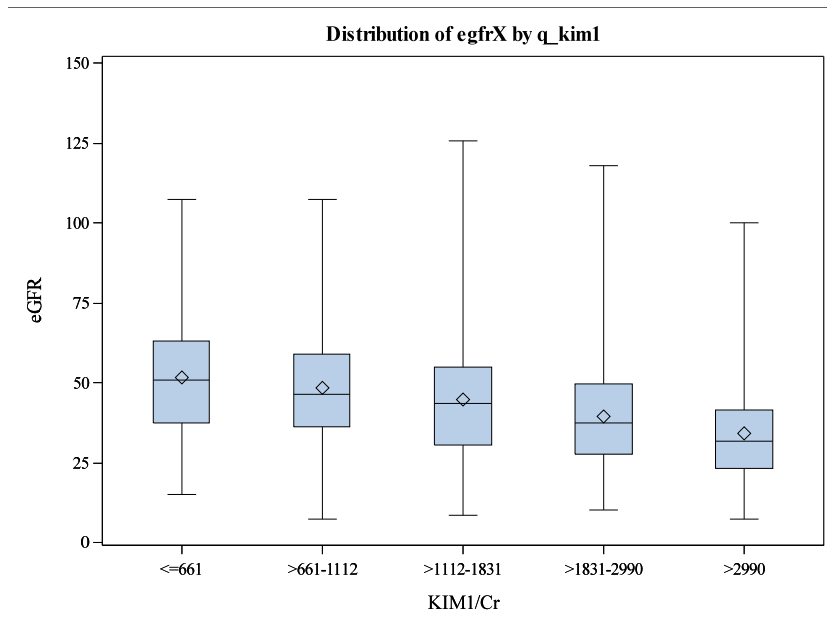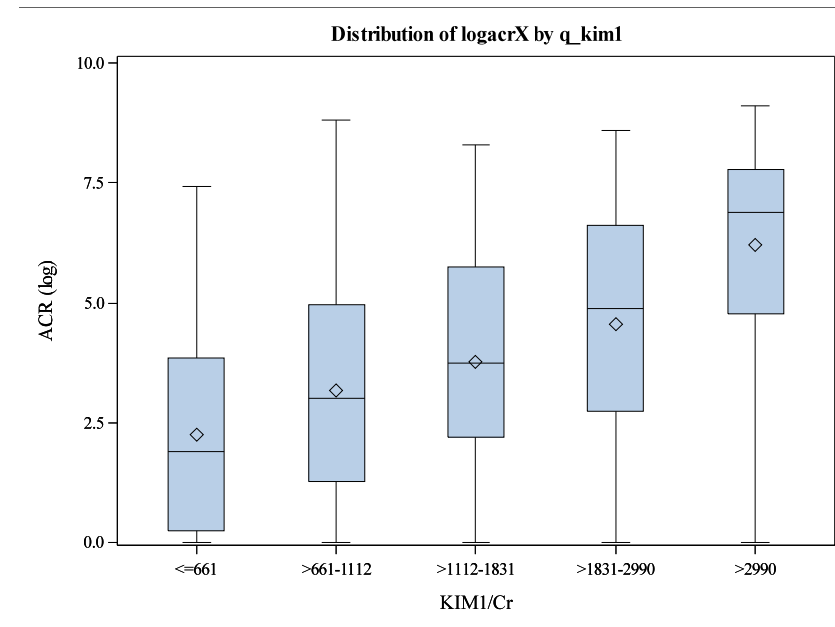

Supplemental material is neither peer-reviewed nor thoroughly edited by CJASN. The authors alone are responsible for the accuracy and presentation of the material.

### Supplemental Figure 1b. Distribution of eGFR and ACR by quintiles of NGAL/Cr.

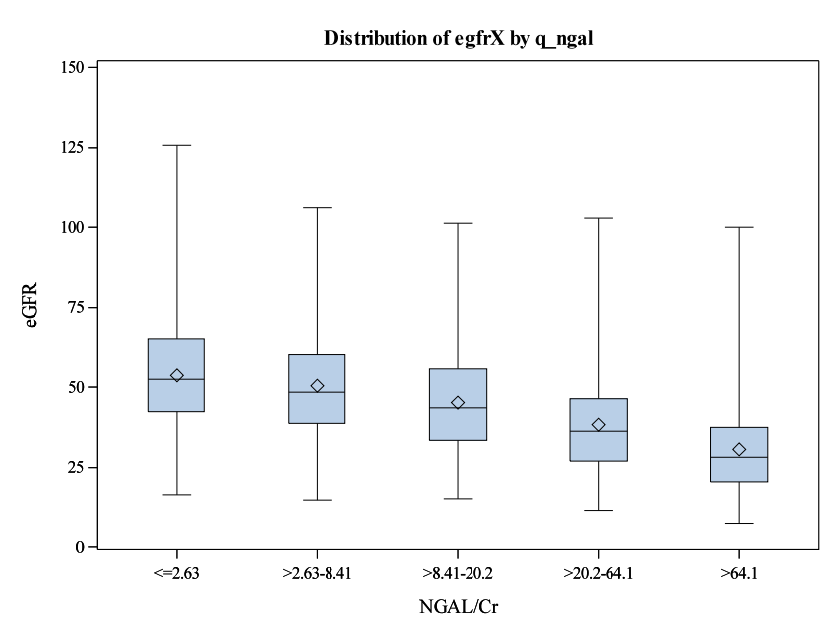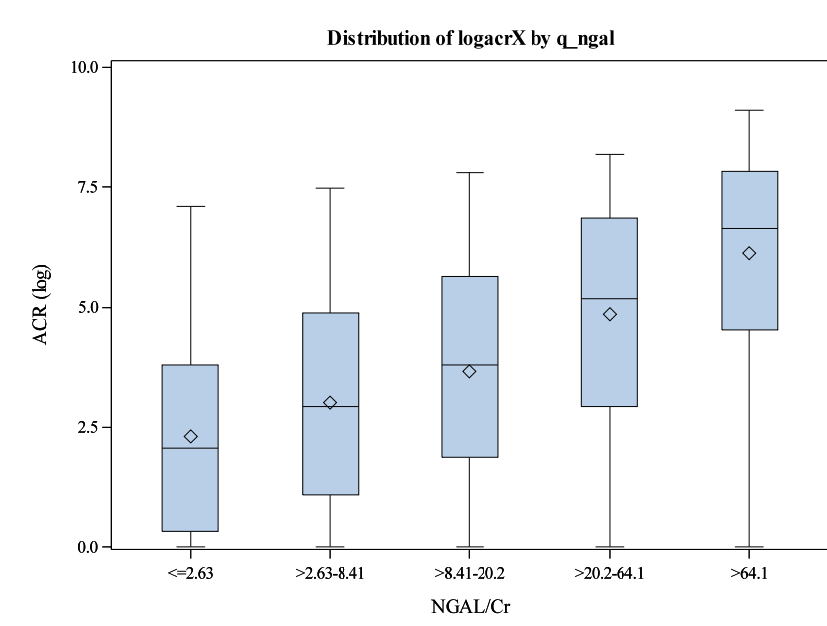

Supplemental material is neither peer-reviewed nor thoroughly edited by CJASN. The authors alone are responsible for the accuracy and presentation of the material.

### Supplemental Figure 1c. Distribution of eGFR and ACR by measurable quartiles of LFABP/Cr.

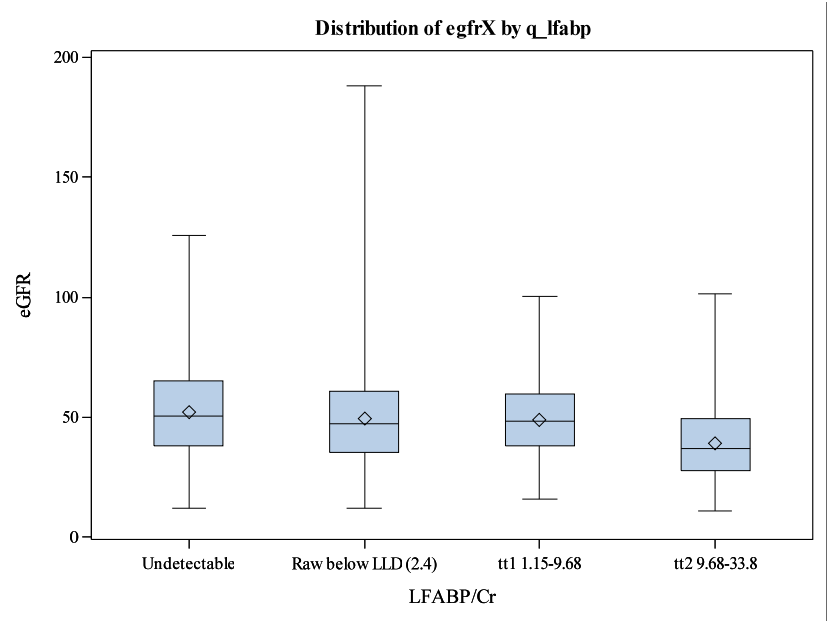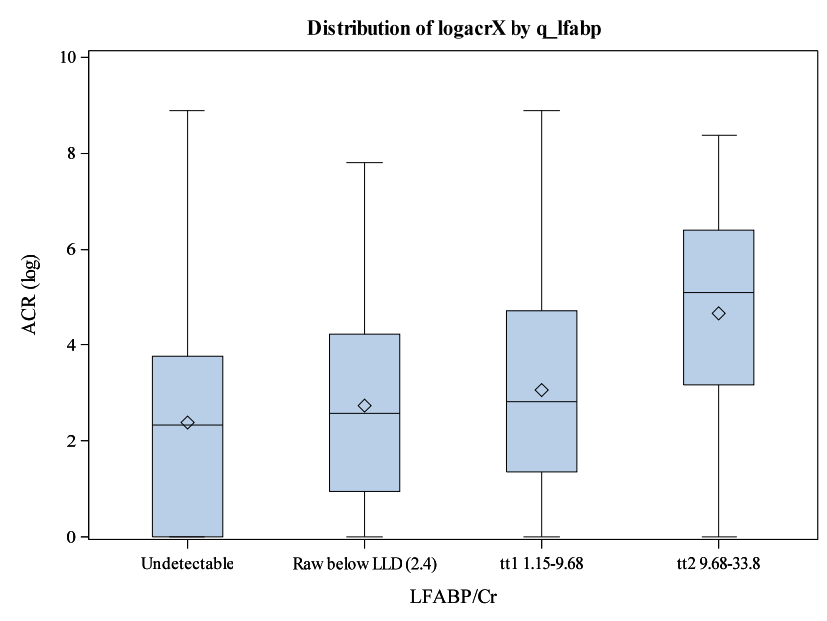

Supplemental material is neither peer-reviewed nor thoroughly edited by CJASN. The authors alone are responsible for the accuracy and presentation of the material.

### Supplemental Figure 1d. Distribution of eGFR and ACR by quintiles of NAG/Cr.

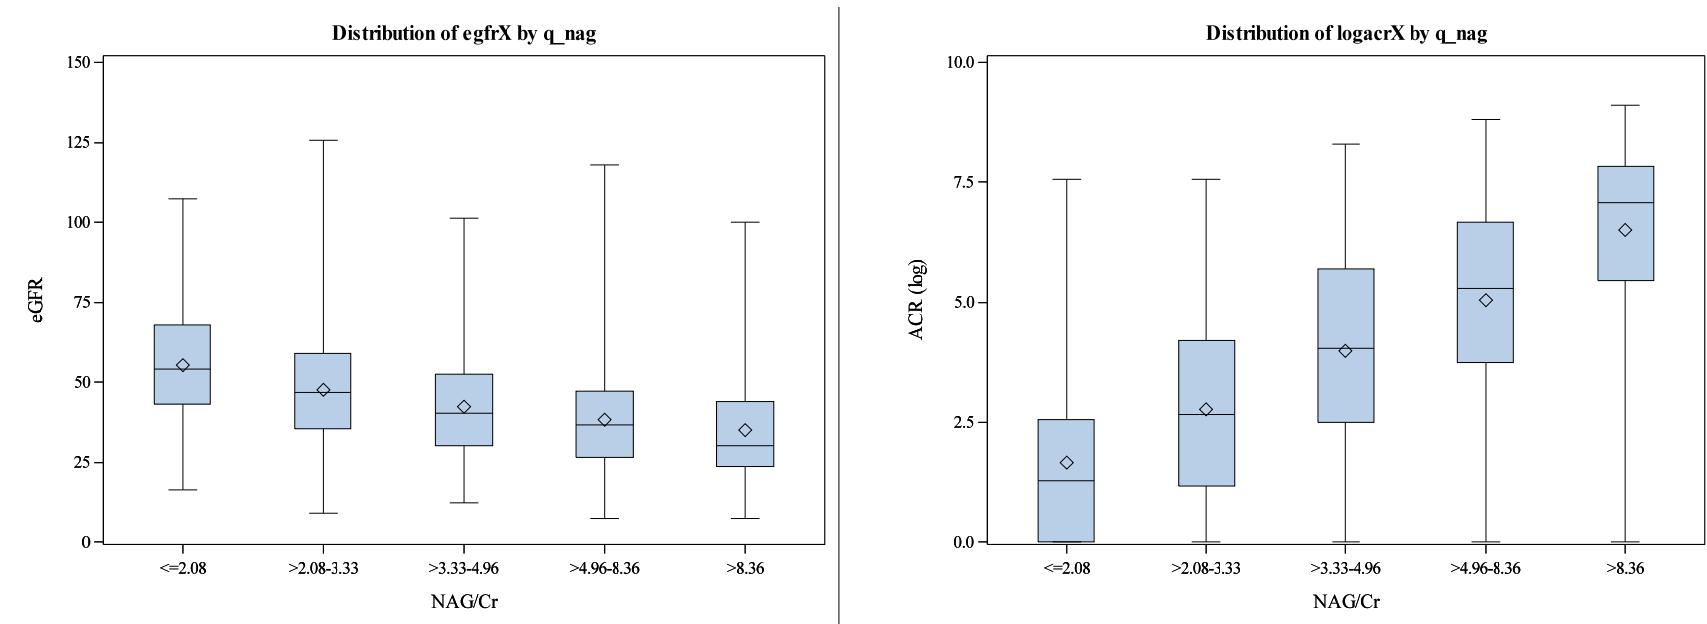



Supplemental material is neither peer-reviewed nor thoroughly edited by CJASN. The authors alone are responsible for the accuracy and presentation of the material.

**Supplemental Figure 2a.** Spline relationship between KIM-1/Cr and Heart Failure.

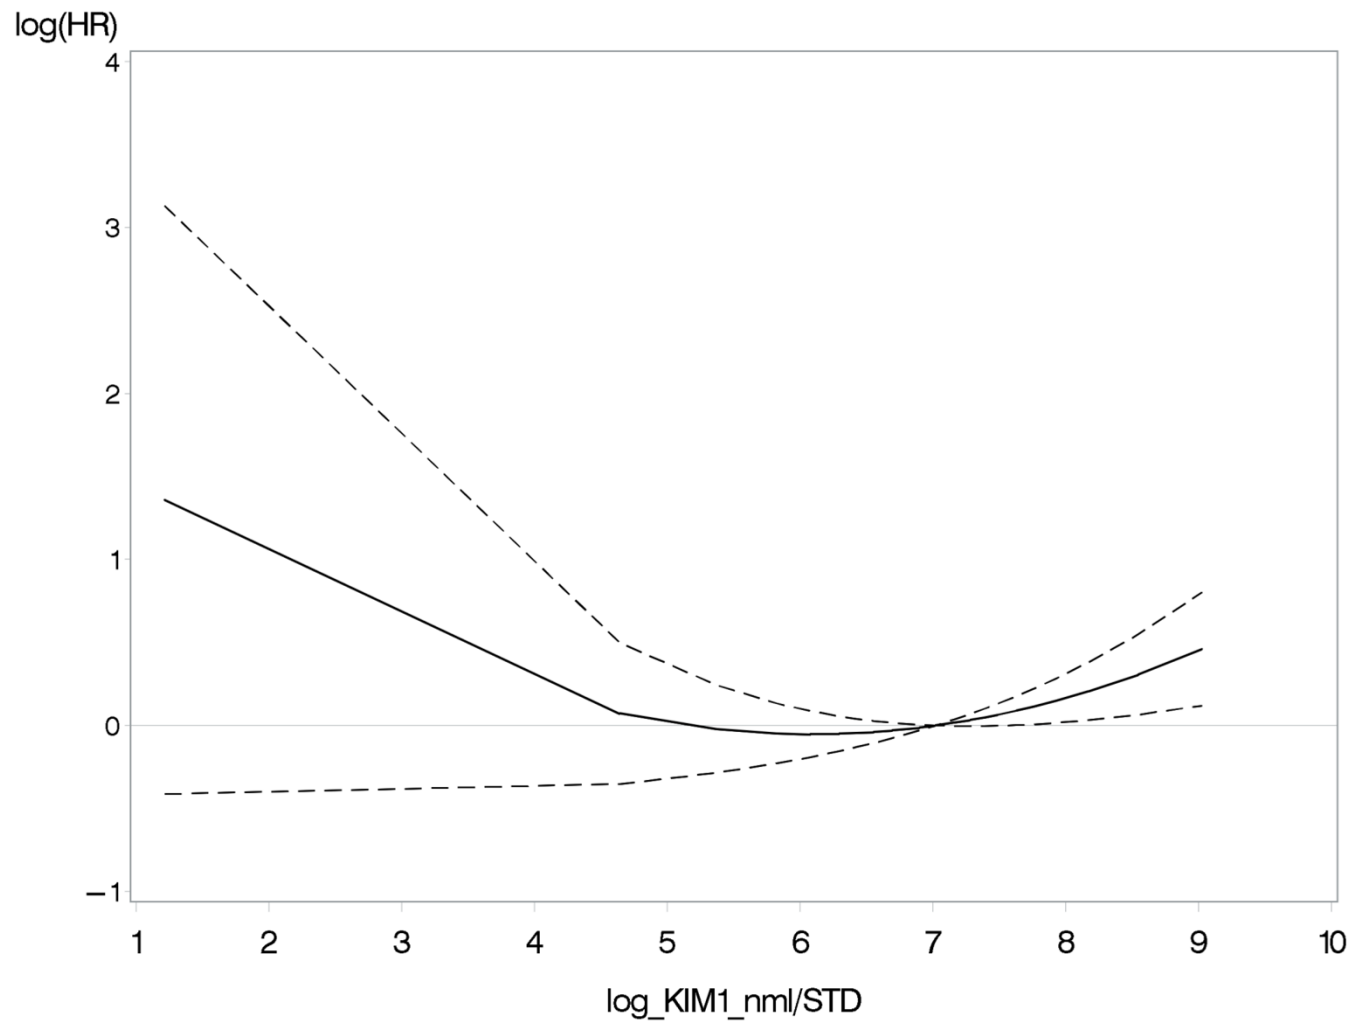

Supplemental material is neither peer-reviewed nor thoroughly edited by CJASN. The authors alone are responsible for the accuracy and presentation of the material.

**Supplemental Figure 2b.** Spline relationship between NAG/Cr and Heart Failure.

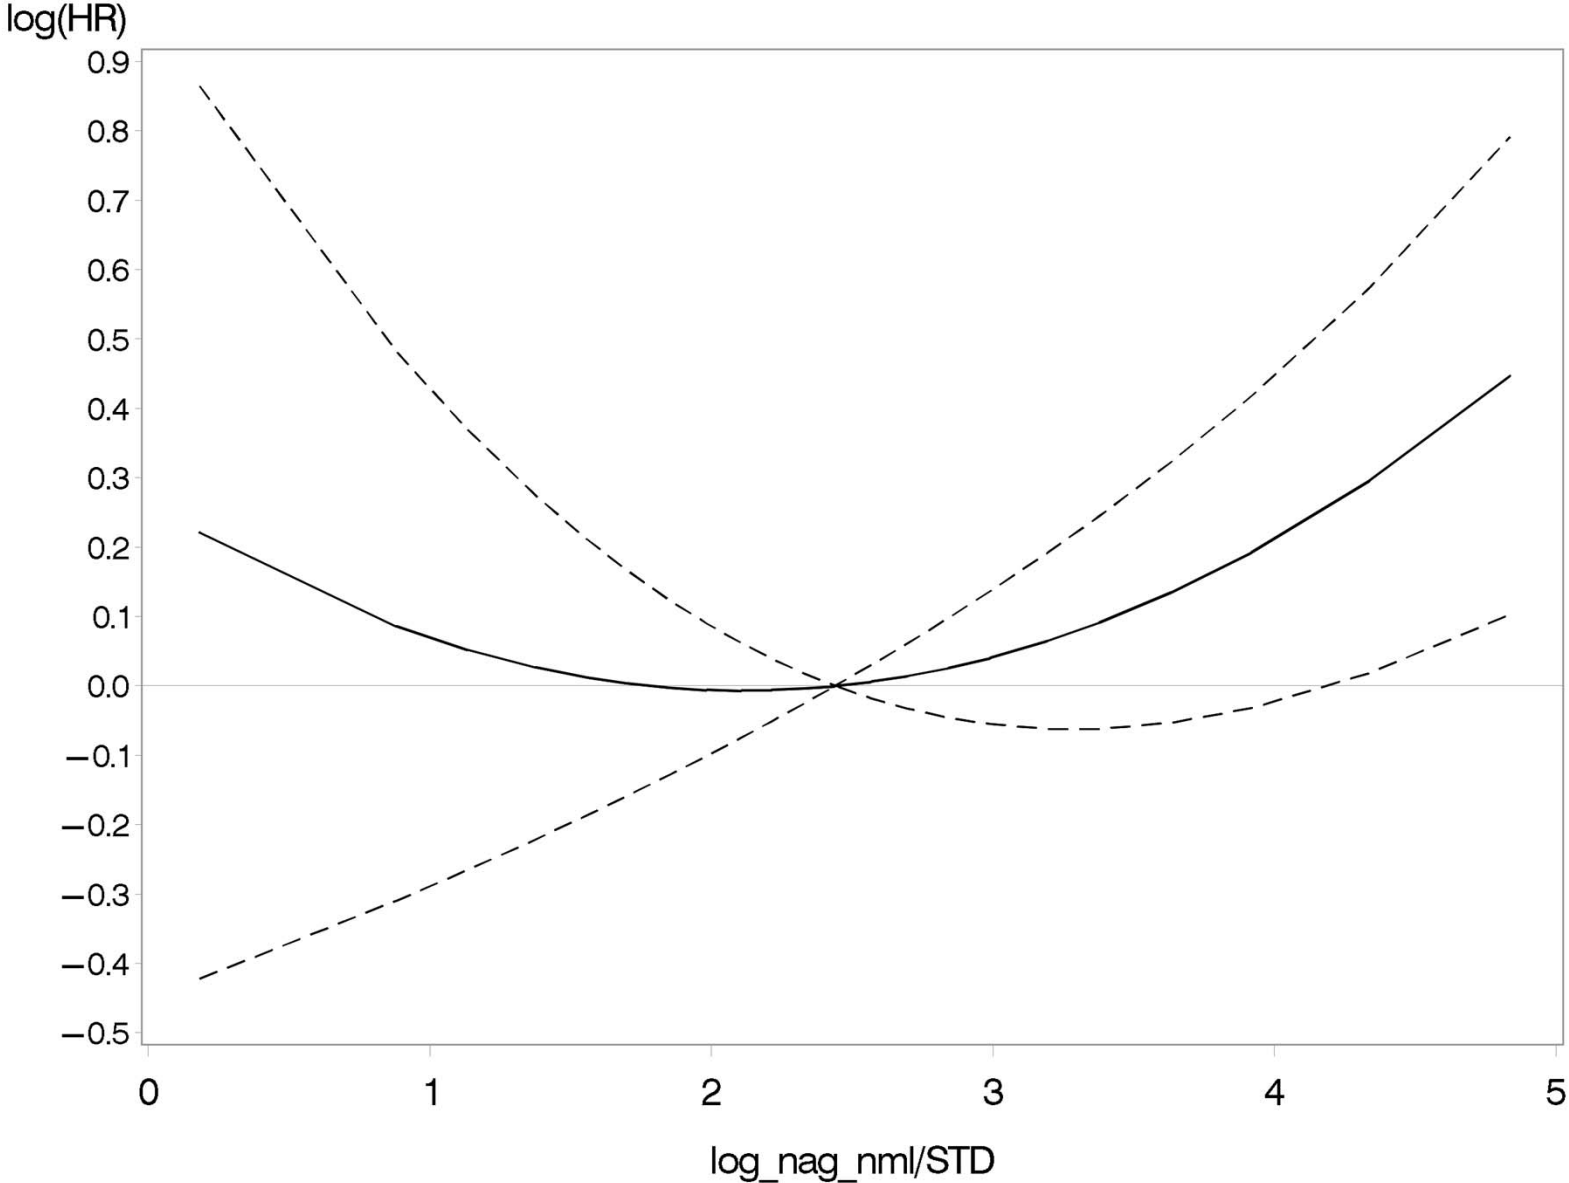

Supplemental material is neither peer-reviewed nor thoroughly edited by CJASN. The authors alone are responsible for the accuracy and presentation of the material.

**Supplemental Figure 2c.** Spline relationship between NAG/Cr and Atherosclerotic Events.

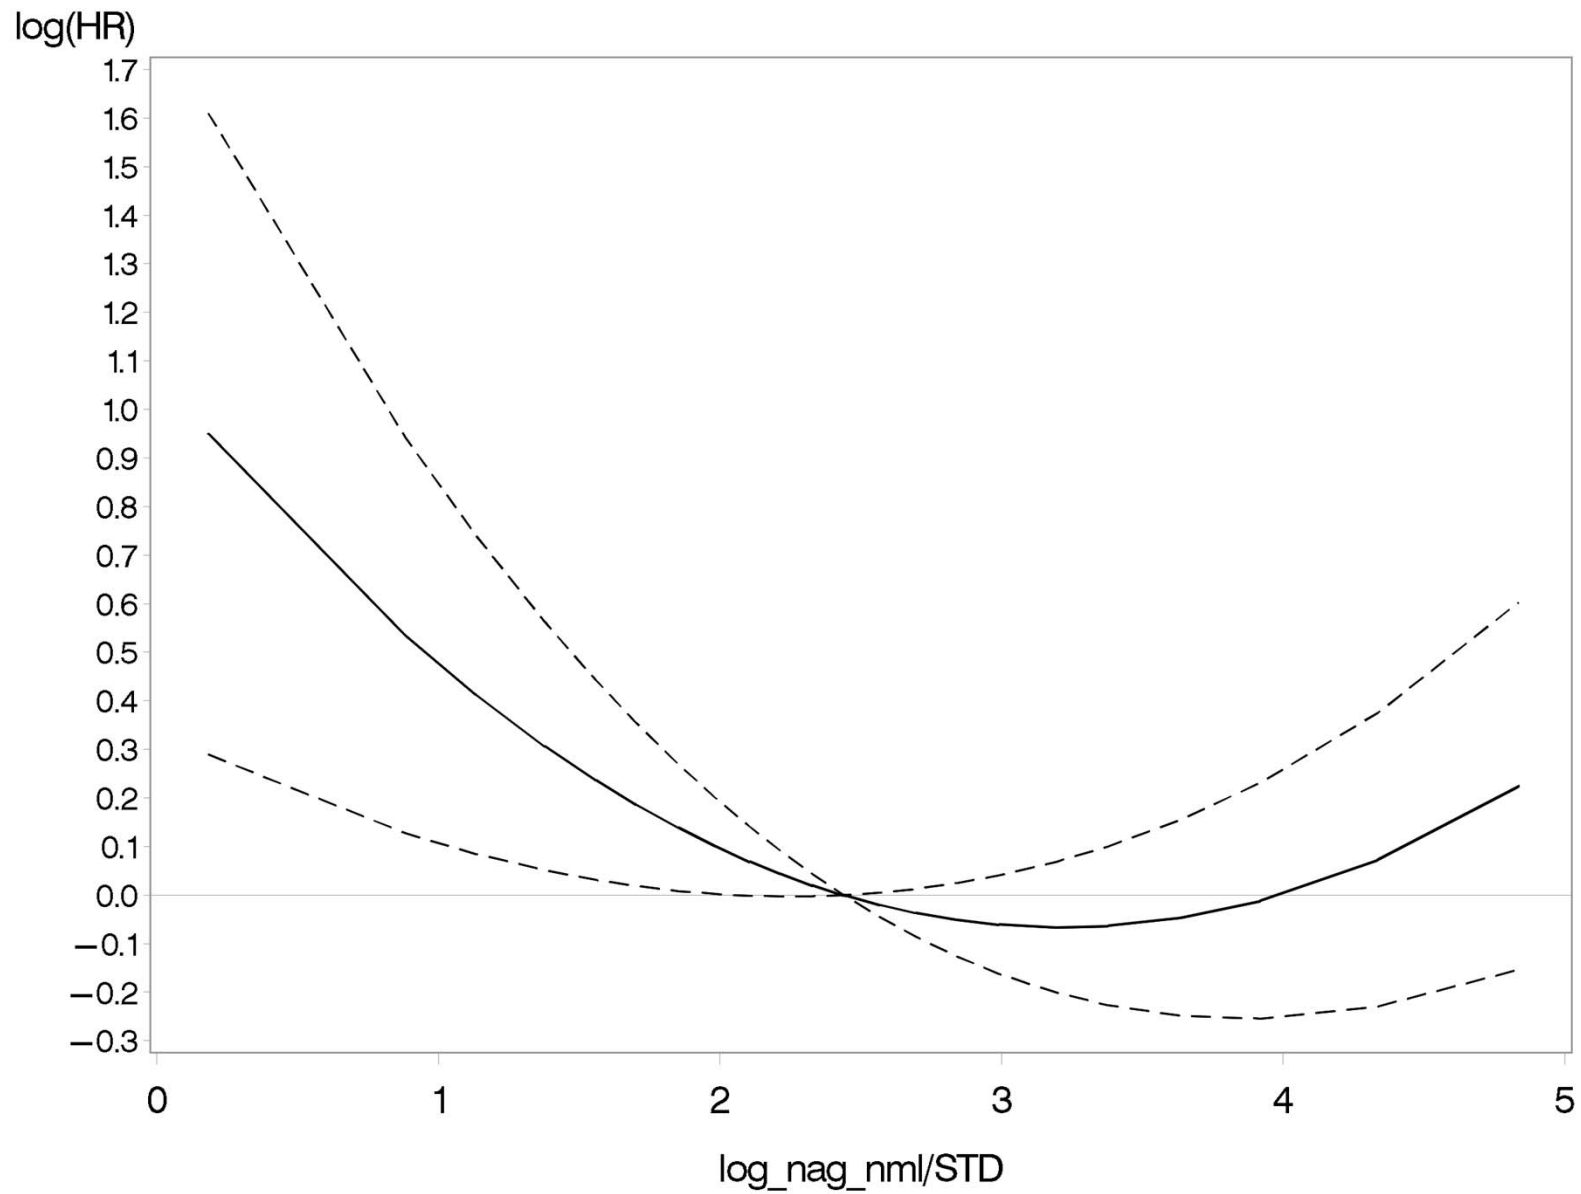

Supplemental material is neither peer-reviewed nor thoroughly edited by CJASN. The authors alone are responsible for the accuracy and presentation of the material.

### Supplemental Figure 2d. Spline relationship between NAG (non-normalized) and Atherosclerotic Events.

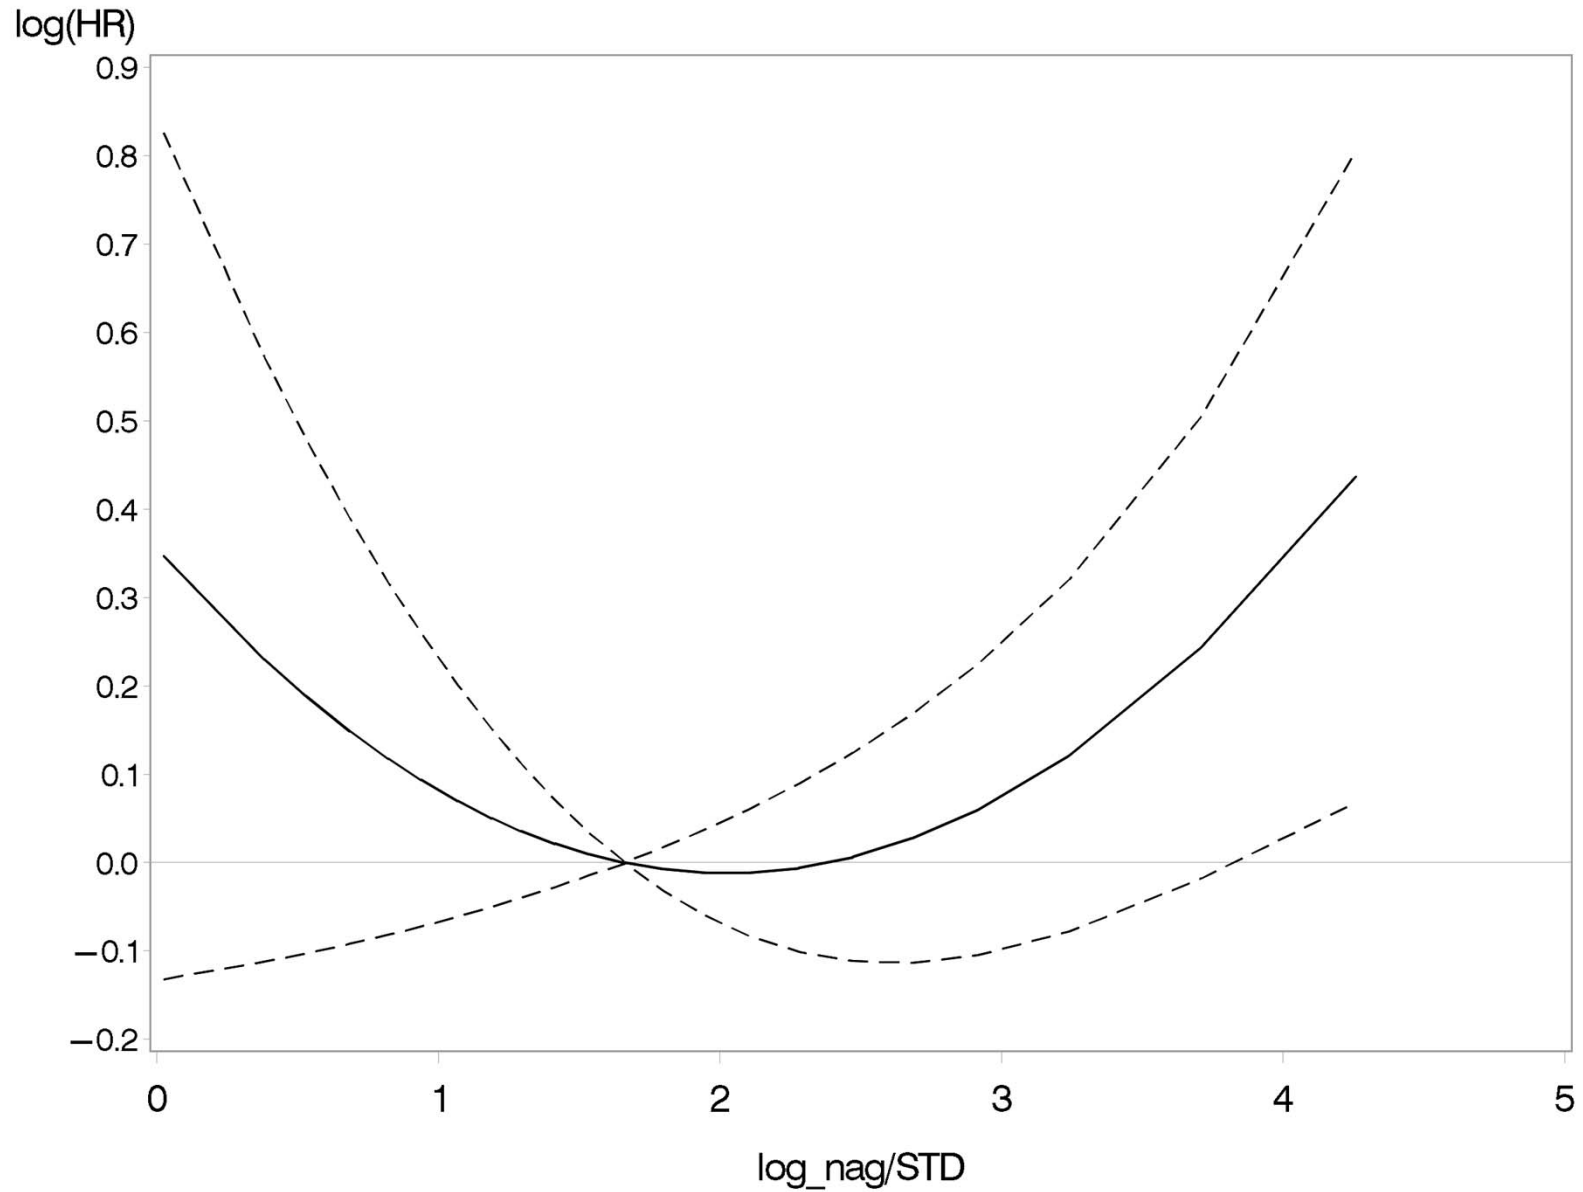

Supplement: CJN.08560816SupplementaryData.pdf [file CJN.08560816SupplementaryData.pdf]
